# Supplementary material for: Assessing Differences between Clinical Isolates of Aspergillus fumigatus from Cases of Proven Invasive Aspergillosis and Colonizing Isolates with Respect to Phenotype (Virulence in Tenebrio molitor Larvae) and Genotype
Source: MDPI journal article supplement (doi:10.3390/pathogens11040428), 2022-03-31
Supplement: s1 [file s1]

**Table S1.** Assembly Statistics for 10 *A. fumigatus* isolates and the public AF293 reference genome (GCF\_000002655.1; ASM265v1).

| Isolate | NG <sub>50</sub> | NG <sub>50</sub> length | Assembly Size (bp) | Complete and single-copy BUSCOs (%) |
|---------|------------------|-------------------------|--------------------|-------------------------------------|
| Af01    | 4                | 3,980,904               | 28,694,393         | 98.3                                |
| Af02    | 4                | 4,042,954               | 28,863,661         | 98.2                                |
| Af03    | 4                | 4,020,486               | 29,139,223         | 98.3                                |
| Af04    | 4                | 3,908,787               | 28,743,407         | 98.3                                |
| Af06    | 4                | 3,898,399               | 28,754,711         | 98.4                                |
| Af10    | 4                | 4,043,438               | 29,129,594         | 98.3                                |
| Af11    | 4                | 3,927,423               | 28,724,611         | 98.3                                |
| Af12    | 4                | 4,000,533               | 29,056,945         | 98.3                                |
| Af13    | 4                | 4,001,372               | 28,916,749         | 98.4                                |
| Af14    | 4                | 3,881,678               | 29,158,005         | 98.3                                |
| Af293   | 4                | 3,948,441               | 29,384,958         | 98.3                                |
