# Supplementary material for: Assessing Differences between Clinical Isolates of Aspergillus fumigatus from Cases of Proven Invasive Aspergillosis and Colonizing Isolates with Respect to Phenotype (Virulence in Tenebrio molitor Larvae) and Genotype
Source: MDPI journal article supplement (doi:10.3390/pathogens11040428), 2022-03-31
Supplement: s1 [file s1]

**Table S2.** Presence / absence of oxidative stress response genes (GO:0006979) in clinical *Aspergillus fumigatus* isolates.

| Clinical Origin | Isolate | Proportion of gene covered (%) <sup>1</sup> |            |            |
|-----------------|---------|---------------------------------------------|------------|------------|
|                 |         | Afu1g08790                                  | Afu4g00180 | Afu5g04050 |
| Colonisation    | Af01    | 99.74                                       | 100        | absent     |
|                 | Af02    | 100                                         | 100        | absent     |
|                 | Af03    | 99.9                                        | absent     | 100        |
|                 | Af04    | 99.71                                       | 100        | 100        |
|                 | Af06    | 99.69                                       | 100        | 100        |
|                 | Af10    | absent                                      | 100        | absent     |
| IA              | Af11    | 100                                         | 100        | 100        |
|                 | Af12    | 99.69                                       | 100        | absent     |
|                 | Af13    | 100                                         | 100        | 100        |
|                 | Af14    | 100                                         | 100        | absent     |

<sup>1</sup> All genes in AF293 implicated in oxidative stress response (GO:0006979) that also have a variable occurrence pattern across the 10 clinical *A. fumigatus* isolates are shown.
