# Supplementary figures and images for: Assessing Differences between Clinical Isolates of Aspergillus fumigatus from Cases of Proven Invasive Aspergillosis and Colonizing Isolates with Respect to Phenotype (Virulence in Tenebrio molitor Larvae) and Genotype
Source: MDPI journal article supplement (doi:10.3390/pathogens11040428), 2022-03-31

**Amphotericin B**

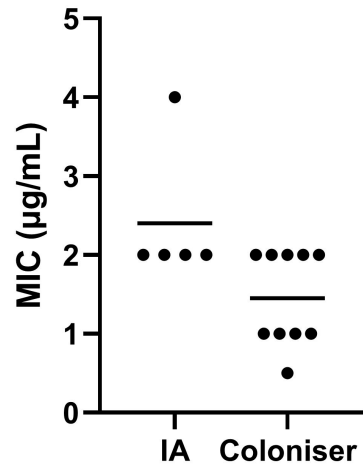

**Anidulafungin**

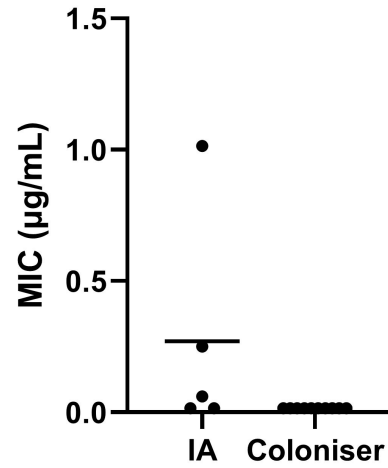

**Micafungin**

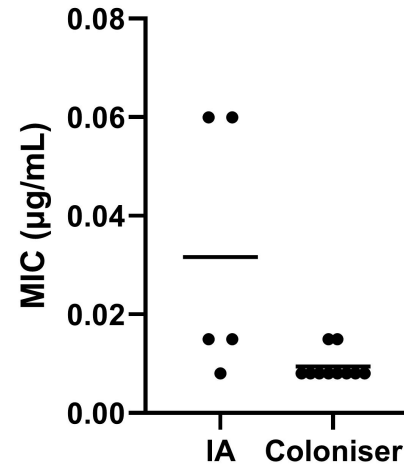

**Voriconazole**

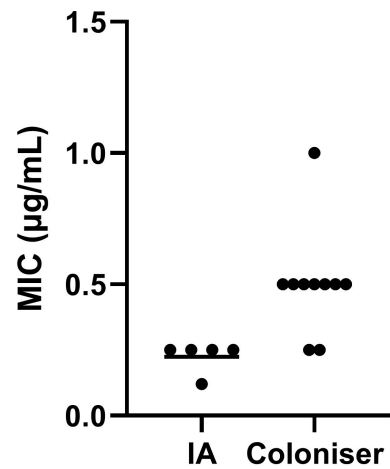

**Itraconazole**

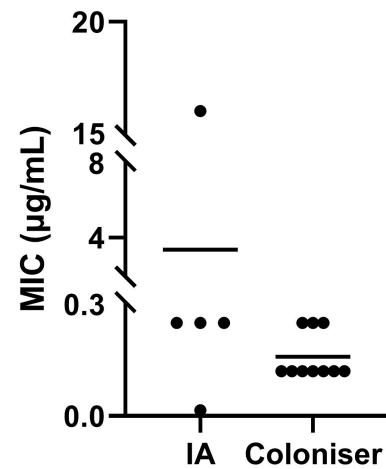

**Posaconazole**

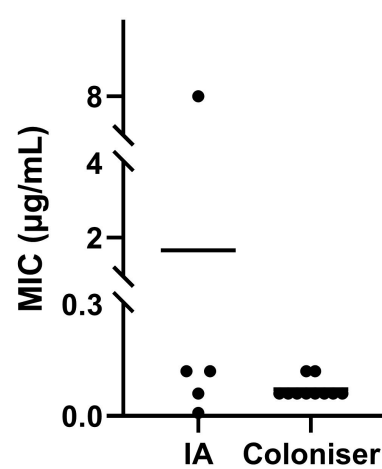

Supplement: s1 [file s1]
